# Supplementary material for: Probing the effect of charge transfer enhancement in off resonance mode SERS via conjugation of the probe dye between silver nanoparticles and metal substrates
Source: Royal Society of Chemistry journal article supplement (doi:10.1039/c3cp51646f), 2013-01-01
Supplement: c3cp51646f.pdf [file c3cp51646f.pdf]

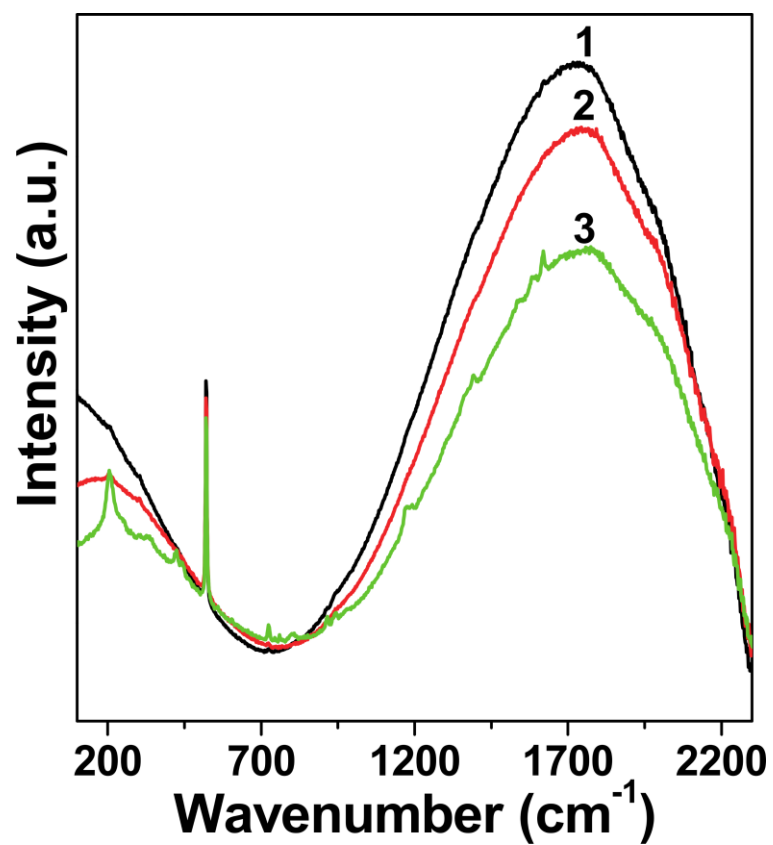

**Figure S1.** FT-Raman spectra recorded from the drop-cast films of crystal violet (1), crystal violet bound gold (2) and silver nanoparticles on silicon substrates.

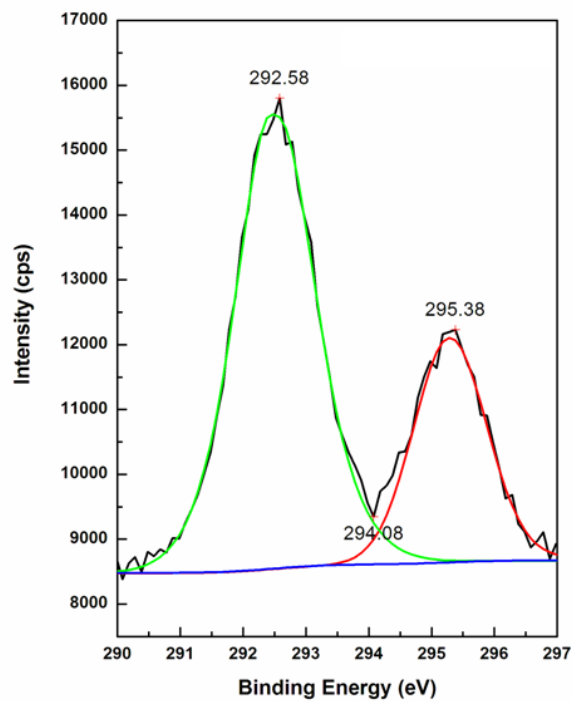

**Figure S2.** K2p core level spectra recorded from tyrosine reduced silver nanoparticles formation

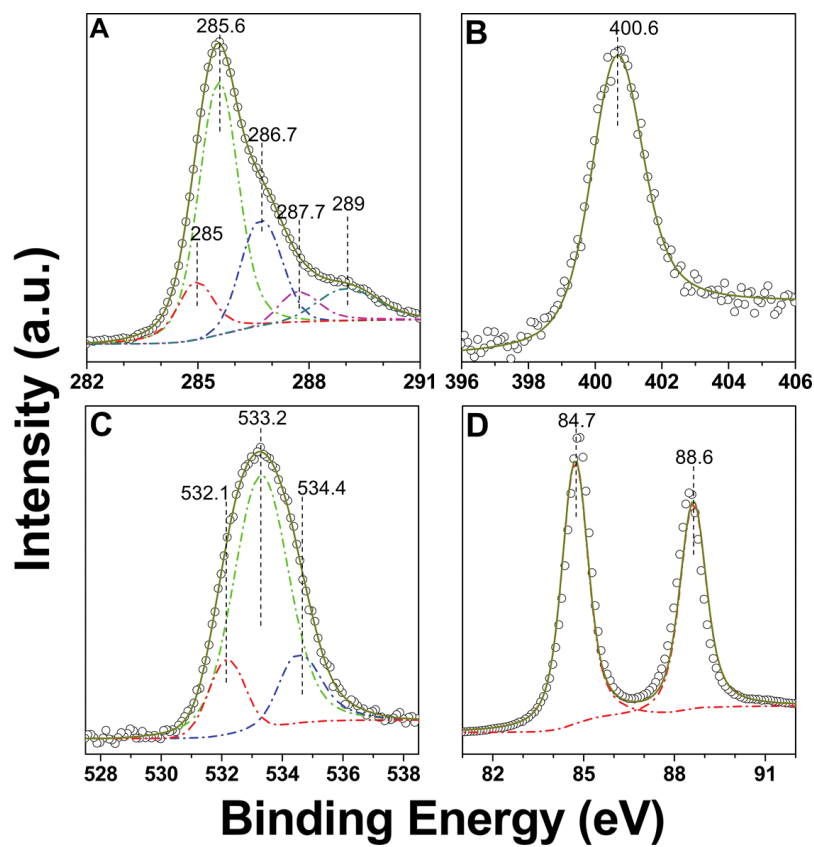

**Figure S3.** XPS spectra core level spectra (A) C 1s, (B) N 1s, (C) O 1s and (D) Au 4f of tyrosine reduced AuNPs on gold substrate.
